# Supplementary material for: Covalently Immobilized Battacin Lipopeptide Gels with Activity against Bacterial Biofilms
Source: MDPI journal article supplement (doi:10.3390/molecules25245945), 2020-12-15
Supplement: s1 [file s1]

Supporting Information

**Covalently Immobilised Battacin Lipopeptide Gels with Activity against Bacterial Biofilms**

Gayana Heruka DeZoysa <sup>a</sup>, Kelvin Wang <sup>b</sup>, Jun Lu <sup>b</sup>, Yacine Hremar<sup>c</sup> and Vijayalekshmi Sarojini<sup>a,d\*</sup>

<sup>a</sup> School of Chemical Sciences and the Centre for Green Chemical Science, The University of Auckland, , Auckland- 1142, New Zealand

<sup>b</sup> School of Science, Auckland University of Technology, 34 St Paul Street, Auckland, New Zealand

<sup>c</sup> Department of Biotechnology and Food Engineering, Guangdong Technion Israel Institute of Technology, Shantou, 515063, Guangdong, China

<sup>d</sup> The MacDiarmid Institute for Advanced Materials and Nanotechnology, Wellington 6140, New Zealand

\*Author for correspondence

Vijayalekshmi Sarojini

Phone: + 64 9 9233387

E-mail: v.sarojini@auckland.ac.nz

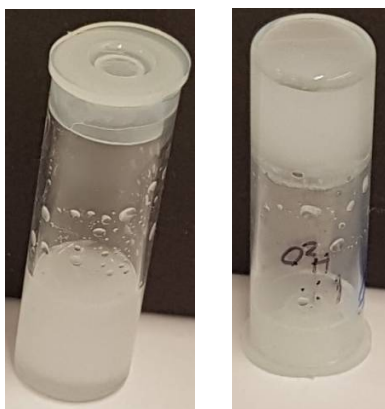

**Figure S1:** Representative Photograph of peptide-PEG precursors dissolved in water before (left) and after (right) UV photopolymerisation.

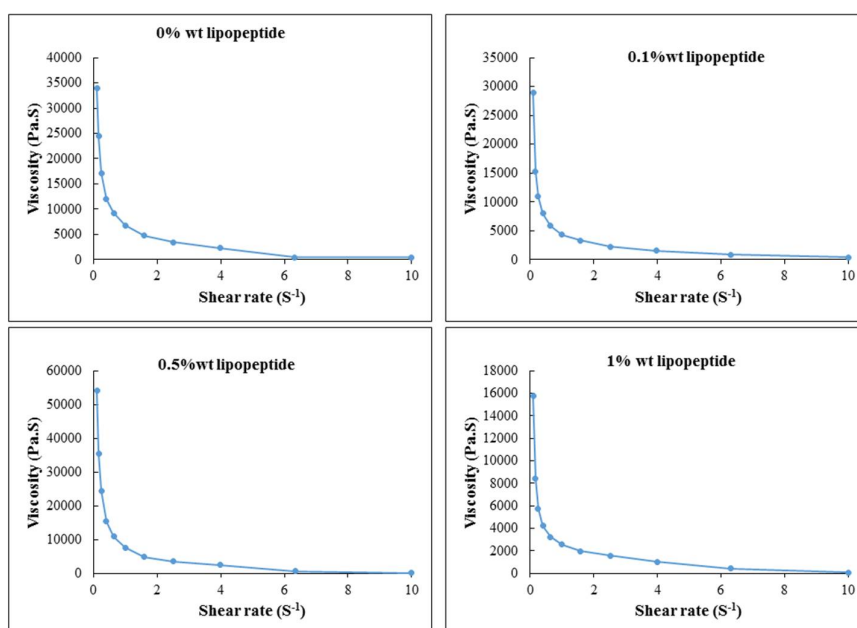

**Figure S2:** Graph showing results from the shear thinning experiment of the hydrogel samples containing different concentrations of the lipopeptide prepared in methanol.

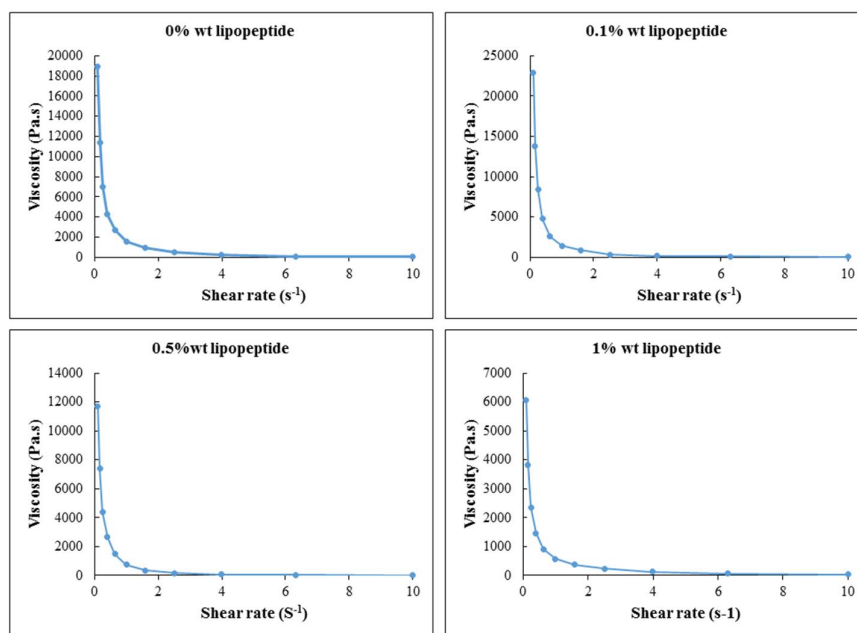

**Figure S3:** Graph showing results from the sheer thinning experiment of the hydrogel samples containing different concentrations of the lipopeptide prepared in water.

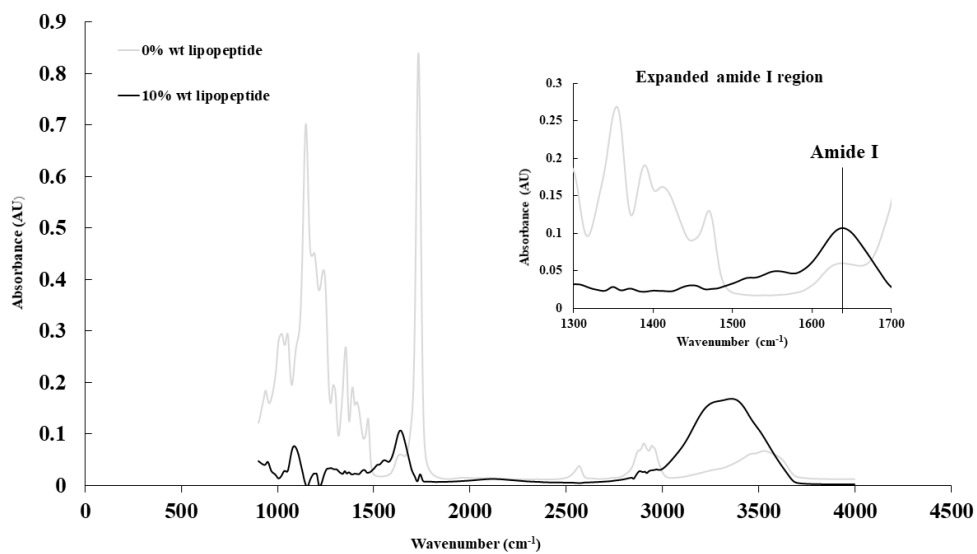

**Figure S4:** Full FT-IR spectrum of the PEG hydrogels prepared in water in the absence and presence of the lipopeptide

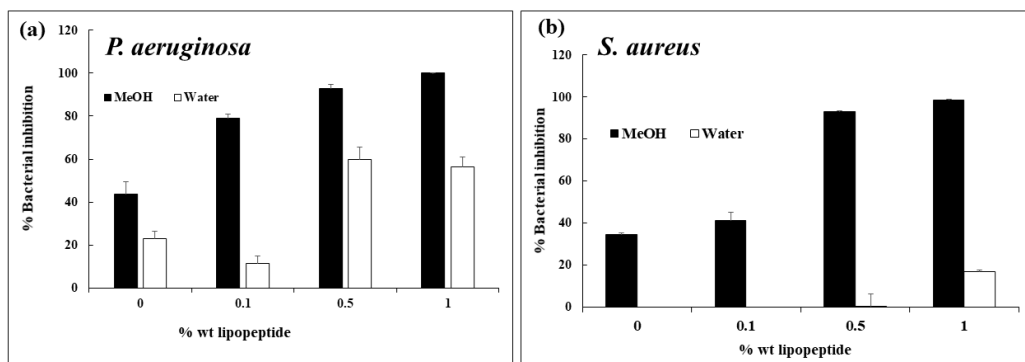

**Figure S5:**The antibacterial activity of lipopeptide gels against bacterial cells released by the seven days old mature biofilms of (a) *P. aeruginosa* and (b) *S. aureus*.

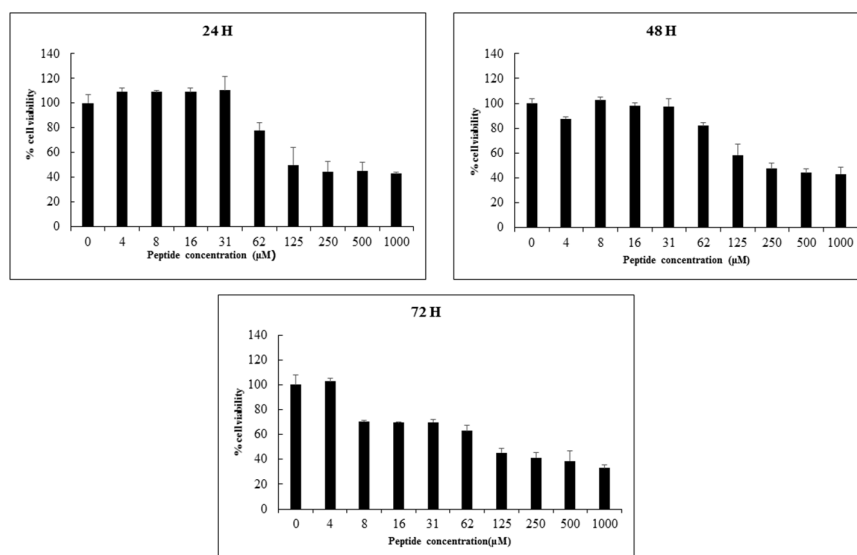

**Figure S6:** MTT- cell viability assay of human dermal fibroblasts treated with different concentrations of the lipopeptide for 24, 48 and 72 hours.
